# Supplementary material for: AuNP Coupled Rapid Flow-Through Dot-Blot Immuno-Assay for COVID-19 (SARS-CoV-2) Explicit IgG Antibody Revelation
Source: Preprints.org preprint supplement (doi:10.20944/preprints202104.0534.v1), 2021-04-20
Supplement: Supplementary file 1 [file supplementary]

**Original Article**

AuNP Coupled Rapid Flow-Through Dot-Blot Immuno-Assay for COVID-19 (SARS-CoV-2) Explicit IgG Antibody Revelation

**Short Title**: Dot-Blot Immuno-Assay for COVID-19.

**List of Authors and Affiliation**

Bijon Kumar Sil ([bijon@grblbd.com](mailto:bijon@grblbd.com))(0000-0002-2777-8387),1,2 Mohd. Raeed Jamiruddin ([mohd.raeed@bracu.ac.bd](mailto:mohd.raeed@bracu.ac.bd)) (0000-0003-0495-4808),1,3 Md. Ahsanul Haq ([shohag.stat02@gmail.com](mailto:shohag.stat02@gmail.com); ahsan@rnabiotech.com.bd) (0000-0002-4408-6104),1 Mohib Ullah Khondoker ([mohib@grblbd.com](mailto:mohib@grblbd.com)) (0000-0003-1021-4435),1,2,4 Nowshin Jahan([nowshin@rnabiotech.com.bd](mailto:nowshin@rnabiotech.com.bd)) (0000-0001-6507-7031),1 Shahad Saif Khandker([shahad@rnabiotech.com.bd](mailto:shahad@rnabiotech.com.bd) ) ([0000-0003-4724-0645](https://orcid.org/0000-0003-4724-0645) ),1 Tamanna Ali ([tamanna@rnabiotech.com.bd](mailto:tamanna@rnabiotech.com.bd)) ([0000-0001-9139-6095](https://orcid.org/0000-0001-9139-6095)),1 Mumtarin Jannat Oishee ([mumtarin@rnabiotech.com.bd](mailto:mumtarin@rnabiotech.com.bd)) (0000-0001-5101-9930),1,2 Taku Kaitsuka (kaitsuka@iuhw.ac.jp) ([0000-0001-5556-](https://orcid.org/0000-0001-9139-6095)8179 ),5 Masayasu Mie ([mie.m.aa@m.titech.ac.jp](mailto:mie.m.aa@m.titech.ac.jp))(0000-0003-2255-3346),6 Kazuhito Tomizawa ([0000-0002-5663-](https://orcid.org/0000-0001-9139-6095)2627)([tomikt@kumamoto-u.ac.jp](mailto:tomikt@kumamoto-u.ac.jp)),7 Eiry Kobatake ([kobatake.e.aa@m.titech.ac.jp](mailto:kobatake.e.aa@m.titech.ac.jp))([0000-0002-2468-5804](https://orcid.org/0000-0002-2468-5804)),6 Mainul Haque8, Nihad Adnan([nihad@juniv.edu](mailto:nihad@juniv.edu)) (0000-0002-4999-4793).1,9

1. Gonoshasthaya-RNA Molecular Diagnostic & Research Center, Dhanmondi, Dhaka-1205, Bangladesh.
2. Department of Microbiology, Gono Bishwabidyalay, Savar, Dhaka-1344, Bangladesh.
3. Department of Pharmacy, BRAC University, Dhaka-1212, Bangladesh
4. Gonoshasthaya Samaj Vittik Medical College, Savar, Dhaka-1344, Bangladesh.
5. School of Pharmacy, International University of Health and Welfare, Enokizu 137-1, Okawa, Fukuoka 831-8501, Japan.
6. School of Life Science and Technology, Tokyo Institute of Technology, Yokohama, Kanagawa 226-8502, Japan.
7. Department of Molecular Physiology, Graduate School of Medical Sciences, Kumamoto University, Kumamoto 860-0811, Japan.
8. The Unit of Pharmacology, Faculty of Medicine and Defence Health Universiti Pertahanan, Nasional Malaysia (National Defence University of Malaysia), Kem Perdana Sugai Besi, Kuala Lumpur 57000, Malaysia.
9. Department of Microbiology, Jahangirnagar University, Savar, Dhaka-1342, Bangladesh.

**Address of Correspondence**

1. Nihad Adnan

Associate Professor

Department of Microbiology, Jahangirnagar University, Savar, Dhaka-1342, Bangladesh

Tel: +8801705709910

Email: [nihad@juniv.edu](mailto:nihad@juniv.edu), nihad@grblbd.com

2. Mainul Haque

Professor

The Unit of Pharmacology, Faculty of Medicine and Defence Health, Universiti Pertahanan, Nasional Malaysia (National Defence University of Malaysia), Kem Perdana Sungai Besi, Kuala Lumpur, 57000, Malaysia

Tel: +60109265543

Email: [runurono@gmail.com](mailto:runurono@gmail.com), [mainul@upnm.edu.my](mailto:mainul@upnm.edu.my)

| **Supplementary Table 1:** Difference in mean OD/cut-off in NCP-IgG ELISA compare to dot-blot intensity scale. | | | | |
| --- | --- | --- | --- | --- |
| NCP-IgG | | | |  |
| Mean | Std. Deviation | N | p-value |
| 1.5616 | 0.62158 | 9 |  |
| 2.4965 | 1.58421 | 10 | 0.320 |
| 4.1102 | 2.06472 | 37 | 0.029 |
| 5.7897 | 2.43612 | 23 | 0.003 |

| **Supplementary Table 2:** Difference in mean OD/cut-off in RBD-IgG ELISA compare to dot-blot intensity scale. | | | | |
| --- | --- | --- | --- | --- |
| RBD-IgG | | | |  |
| Intensity scale | Mean | Std. Deviation | N | p-value |
| 0.5+ | 1.5385 | 0.75056 | 9 |  |
| 1+ | 2.9838 | 1.35919 | 10 | 0.150 |
| 2+ | 5.3902 | 2.49363 | 37 | 0.003 |
| 3+ | 7.3748 | 2.18459 | 23 | 0.001 |

P-values were estimated as 0.5+ vs 1+, 1+ vs 2+, 2+ vs 3+
